# Supplementary material
Source: MDPI journal article supplement (https://www.mdpi.com/2073-4441/14/3/501)
Supplement: s1 [file s1]

## An underestimated contribution of deltaic denitrification in reducing nitrate export to the coastal zone (Po River-Adriatic Sea, Northern Italy)

Maria Pia Gervasio, Elisa Soana\*, Fabio Vincenzi and Giuseppe Castaldelli

DiSAP- Department of Environmental and Prevention Sciences, University of Ferrara, Via L. Borsari 46, 44121 Ferrara, Italy

\* corresponding author

[elisa.soana@unife.it](mailto:elisa.soana@unife.it)

### Supplementary Material

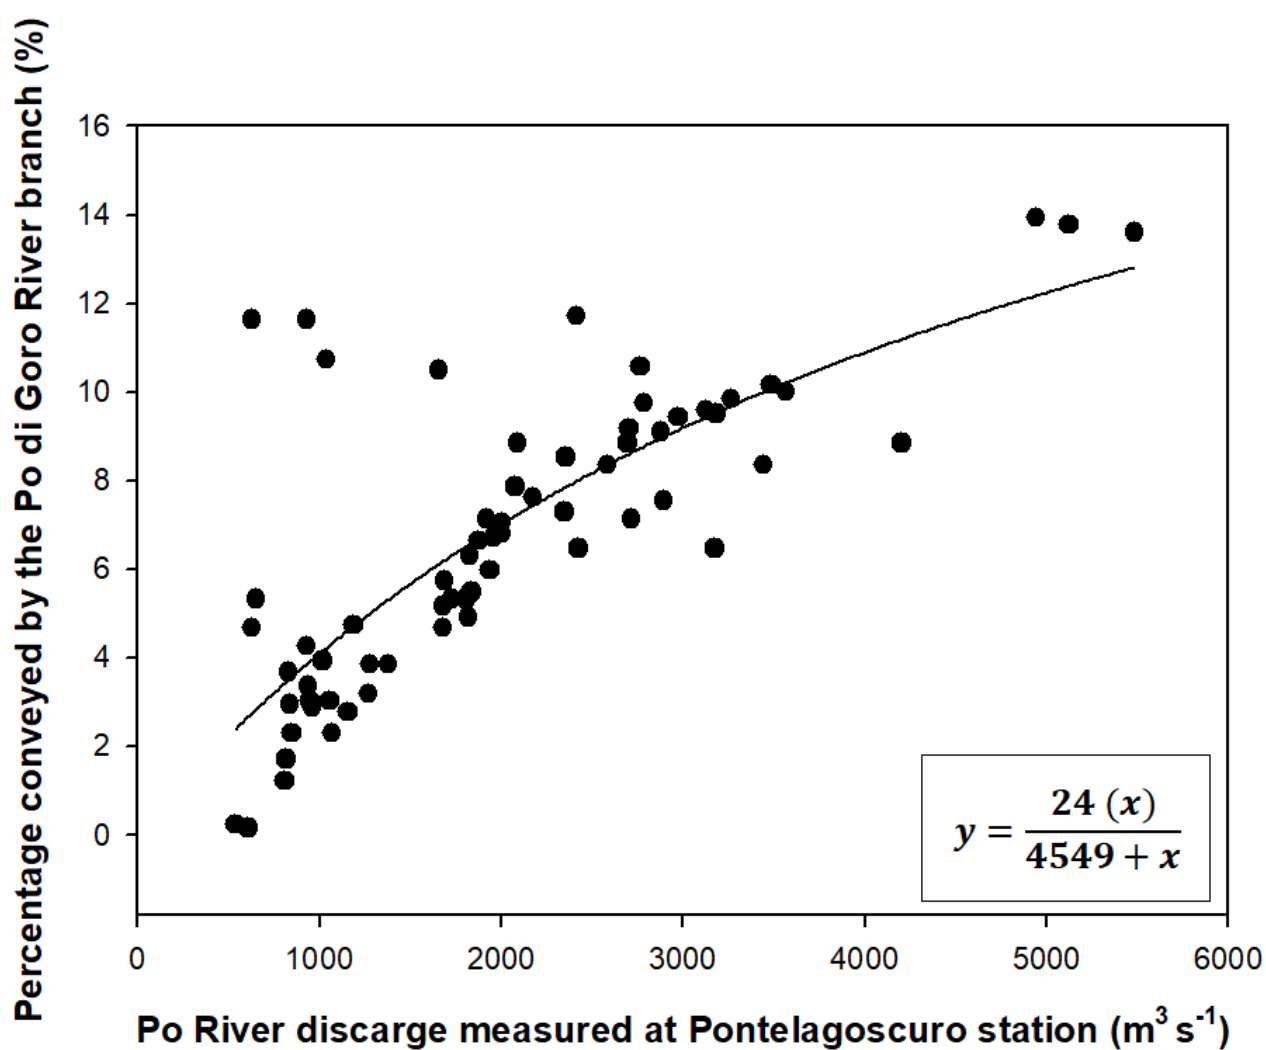

**Figure S1:** Relation between the Po River discharge measured at Pontelagoscuro station and the percentage conveyed by the Po di Goro branch (data from [1]).

**Table S1:** Total denitrification rates measured via Isotope Pairing Technique in different aquatic ecosystems of the Po River basin during the period of the highest temperature of the year (CW, connected wetlands; IW, isolated wetlands; R, rivers; LK, lakes; LG, lagoons). Main sediment and water features are reported for comparison. SOD and Dt<sub>tot</sub> are expressed as average values with associated standard deviation (in brackets).

| Type | Location                        | T (°C) | NO <sub>3</sub> <sup>-</sup> (μM) | OM (%) | SOD (μmol O <sub>2</sub> m <sup>-2</sup> h <sup>-1</sup> ) | Dt <sub>tot</sub> (μmol N m <sup>-2</sup> h <sup>-1</sup> ) | References |
|------|---------------------------------|--------|-----------------------------------|--------|------------------------------------------------------------|-------------------------------------------------------------|------------|
| CW   | Gabbioneta (oxbow lake)         | 25.0   | 378                               | 10.71  | 3240 ± 530                                                 | 1888 ± 628                                                  | [2]        |
| CW   | Gerre Gavazzi (oxbow lake)      | 23.0   | 849                               | 11.26  | 1540 ± 90                                                  | 448 ± 338                                                   |            |
| CW   | Runate dx (oxbow lake)          | 23.0   | 390                               | 1.47   | 1460 ± 70                                                  | 384 ± 134                                                   |            |
| CW   | Runate sn (oxbow lake)          | 24.0   | 729                               | 8.13   | 2530 ± 520                                                 | 707 ± 221.87                                                |            |
| CW   | Cà Nuove Bernini (pond)         | 26.0   | 1048                              | 13.51  | 2010 ± 360                                                 | 329 ± 197                                                   |            |
| IW   | Bine (oxbow lake)               | 26.0   | 4                                 | 16.32  | 2500 ± 320                                                 | 24 ± 5                                                      |            |
| IW   | Mosio (marsh)                   | 25.0   | 9                                 | 5.77   | 3700 ± 200                                                 | 106 ± 26                                                    |            |
| IW   | Marcaria (marsh)                | 25.0   | 147                               | 33.18  | 2420 ± 320                                                 | 231 ± 24                                                    |            |
| IW   | Belforte (marsh)                | 25.0   | 2                                 | 19.20  | 3040 ± 130                                                 | 9 ± 3                                                       |            |
| IW   | Gerre de' Caprioli (oxbow lake) | 22.0   | 2                                 | 8.61   | 1580 ± 190                                                 | 17 ± 1                                                      |            |
| IW   | Lancone (oxbow lake)            | 27.0   | 1                                 | 12.24  | 1590 ± 210                                                 | 13 ± 2                                                      |            |
| IW   | Lazzaretto (pond)               | 27.0   | 8                                 | 23.40  | 2830 ± 80                                                  | 27 ± 2                                                      |            |
| IW   | Gerre Ugolani (pond)            | 23.0   | 2                                 | 8.81   | 3620 ± 310                                                 | 14 ± 4                                                      |            |
| IW   | Cà de' Gatti (pond)             | 23.0   | 29                                | 27.51  | 3070 ± 710                                                 | 192 ± 68                                                    |            |
| IW   | Cascina S. Margherita (pond)    | 27.0   | 2                                 | 13.57  | 1810 ± 110                                                 | 50 ± 22                                                     |            |
| IW   | Ostiglia (marsh)                | 25.0   | 9                                 | 34.80  | 2410 ± 200                                                 | 54 ± 15                                                     |            |
| R    | Bogina canal                    | 24.0   | 113                               | 6.43   | 1810 ± 110                                                 | 338 ± 102                                                   |            |
| R    | Mincio River                    | 24.0   | 9                                 | 17.80  | -                                                          | 38 ± 3                                                      |            |
| CW   | Middle Lake                     | 25.9   | 163                               | 15.00  | 962 ± 85                                                   | 405 ± 21                                                    | [3]        |
| CW   | Middle Lake                     | 29.1   | 3                                 | 15.00  | 1667 ± 85                                                  | 58 ± 5                                                      |            |
| CW   | Middle Lake                     | 22.2   | 50                                | 15.00  | 1196 ± 85                                                  | 329 ± 25                                                    |            |
| R    | Mincio River                    | 22.4   | 122                               | 9.30   | 1780 ± 210                                                 | 340 ± 99                                                    | [4]        |
| R    | Mincio River                    | 25.1   | 124                               | 9.30   | 3000 ± 830                                                 | 359 ± 97                                                    |            |
| R    | Fornaro canal                   | 26.4   | 39                                | -      | 3390 ± 930                                                 | 282 ± 99                                                    | [5]        |
| R    | Codrea canal                    | 23.2   | 57                                | -      | 2220 ± 500                                                 | 138 ± 36                                                    |            |
| R    | Quartesane canal                | 21.8   | 57                                | -      | 2870 ± 260                                                 | 201 ± 36                                                    |            |
| R    | Fossa Lavezzola canal           | 23.0   | 11                                | -      | -                                                          | 45 ± 27                                                     |            |
| R    | Spring-fed canal 1              | 17.1   | 395                               | 4.22   | 2660 ± 490                                                 | 480 ± 130                                                   | [6]        |
| R    | Spring-fed canal 2              | 17.1   | 386                               | 0.73   | 1350 ± 420                                                 | 60 ± 20                                                     |            |
| LK   | Bosco della Lite (pit lake)     | 27.0   | 56                                | 3.11   | 2270 ± 130                                                 | 114 ± 8                                                     | [7]        |
| LK   | Ca' Morta (pit lake)            | 27.0   | 92                                | 2.12   | 1290 ± 400                                                 | 191 ± 32                                                    |            |

|    |                                |      |     |      |              |            |      |
|----|--------------------------------|------|-----|------|--------------|------------|------|
| LK | Isola Giarola (pit lake)       | 27.0 | 51  | 3.23 | 2400 ± 440   | 159 ± 34   |      |
| LK | Ca' Stanga (pit lake)          | 27.0 | 144 | 2.51 | 1870 ± 00    | 316 ± 37   |      |
| LK | Lake Verde (pit lake)          | 27.0 | 156 | 2.01 | 1960 ± 220   | 224 ± 18   |      |
| LK | Lake Idro                      | 23.0 | 54  | 6.82 | -            | 96 ± 11    | [8]  |
| LK | Piacenza pit lake              | 27.0 | 155 | 2.10 | 2400 ± 280   | 326 ± 51   | [9]  |
| LG | Sacca di Goro lagoon - Giralda | 26.0 | 19  | 6.40 | 4800 ± 250   | 308        | [10] |
| LG | Sacca di Goro lagoon - Giralda | 27.0 | 14  | 6.40 | -            | 79         |      |
| LG | Sacca di Goro lagoon - Gorino  | 28.0 | 24  | 4.40 | -            | 28         |      |
| LG | Sacca di Goro lagoon - Gorino  | 22.0 | 11  | 4.40 | -            | 107        |      |
| LG | Sacca di Goro lagoon - Giralda | 27.0 | 1   | 3.00 | 6000 ± 1200  | 8          | [11] |
| LG | Sacca di Goro lagoon - Gorino  | 26.0 | 2   | -    | 5000 ± 1000  | 10 ± 2     |      |
| LG | Sacca di Goro lagoon - Goro-10 | 20.0 | 54  | 1.36 | 7330 ± 1410  | 223 ± 7    | [12] |
| LG | Sacca di Goro lagoon - Goro-13 | 21.0 | 34  | 1.74 | 14650 ± 3110 | 124 ± 11   |      |
| LG | Sacca di Goro lagoon - Goro-15 | 21.0 | 40  | 2.38 | 11350 ± 1200 | 175 ± 5    |      |
| LG | Sacca di Goro lagoon - Goro-16 | 20.0 | 35  | 0.92 | 11450 ± 3310 | 102 ± 27   |      |
| LG | Sacca di Goro lagoon - Goro-21 | 20.0 | 1   | 1.62 | 6730 ± 1810  | 14 ± 1     |      |
| LG | Sacca di Goro lagoon - Gorino  | 25.0 | 47  | 3.00 | 3920 ± 300   | 217 ± 43   | [13] |
| LG | Sacca di Goro lagoon - Giralda | 23.0 | 26  | -    | 4290 ± 870   | 70 ± 13    |      |
| R  | Drainage canal                 | 26.0 | 50  | -    | -            | 512 ± 236  | [14] |
| R  | Drainage canal                 | 27.0 | 100 | -    | -            | 855 ± 130  |      |
| R  | Drainage canal                 | 28.0 | 200 | -    | -            | 1101 ± 98  |      |
| R  | Drainage canal                 | 29.0 | 300 | -    | -            | 1671 ± 230 |      |
| R  | Drainage canal                 | 30.0 | 500 | -    | -            | 1600 ± 366 |      |

**Table S2:** Summary of benthic fluxes and denitrification rates measured in the Po di Goro. Average values ± standard deviations are reported.

| Site | Parameter                                                                 |                                                             |                                                                           |                                                 |                                                 |                                                   |                                                               |
|------|---------------------------------------------------------------------------|-------------------------------------------------------------|---------------------------------------------------------------------------|-------------------------------------------------|-------------------------------------------------|---------------------------------------------------|---------------------------------------------------------------|
|      | NO <sub>3</sub> <sup>-</sup><br>(μmol N m <sup>-2</sup> h <sup>-1</sup> ) | N <sub>2</sub><br>(μmol N m <sup>-2</sup> h <sup>-1</sup> ) | NH <sub>4</sub> <sup>+</sup><br>(μmol N m <sup>-2</sup> h <sup>-1</sup> ) | Dw<br>(μmol N m <sup>-2</sup> h <sup>-1</sup> ) | Dn<br>(μmol N m <sup>-2</sup> h <sup>-1</sup> ) | Dtot<br>(μmol N m <sup>-2</sup> h <sup>-1</sup> ) | SOD<br>(μmol O <sub>2</sub> m <sup>-2</sup> h <sup>-1</sup> ) |
| M    | - 402 ± 169                                                               | 424 ± 103                                                   | 444 ± 194                                                                 | 294 ± 94                                        | 128 ± 57                                        | 422 ± 99                                          | 2731 ± 521                                                    |
| G    | - 397 ± 193                                                               | 373 ± 250                                                   | 821 ± 478                                                                 | 305 ± 123                                       | 0                                               | 305 ± 123                                         | 3111 ± 815                                                    |
| LV   | - 83 ± 41                                                                 | 57 ± 42                                                     | 656 ± 171                                                                 | 95 ± 13                                         | 10 ± 8                                          | 105 ± 5                                           | 2759 ± 234                                                    |

## References:

1. Environmental Protection Agency of the Veneto Region. (2012). Distribution of flows among the branches of the Po River and the outlets of the Po Delta Po: historical experiences and new investigations during the 2011. Relation n° 2/12. In Italian. Available online: <https://www.arpa.veneto.it/temi-ambientali/idrologia/approfondimenti/lidrologia-del-delta-del-po>
2. Racchetti, E., Bartoli, M., Soana, E., Longhi, D., Christian, R. R., Pinardi, M., & Viaroli, P. (2011). Influence of hydrological connectivity of riverine wetlands on nitrogen removal via denitrification. *Biogeochemistry*, 103(1), 335-354. <https://doi.org/10.1007/s10533-010-9477-7>
3. Pinardi, M., Bartoli, M., Longhi, D., & Viaroli, P. (2011). Net autotrophy in a fluvial lake: the relative role of phytoplankton and floating-leaved macrophytes. *Aquatic Sciences*, 73(3), 389-403. [10.1007/s00027-011-0186-7](https://doi.org/10.1007/s00027-011-0186-7)
4. Pinardi, M., Bartoli, M., Longhi, D., Marzocchi, U., Laini, A., Ribaud, C., & Viaroli, P. (2009). Benthic metabolism and denitrification in a river reach: a comparison between vegetated and bare sediments. *Journal of Limnology*, 68(1), 133-145.
5. Castaldelli, G., Soana, E., Racchetti, E., Vincenzi, F., Fano, E. A., & Bartoli, M. (2015). Vegetated canals mitigate nitrogen surplus in agricultural watersheds. *Agriculture, Ecosystems & Environment*, 212, 253-262. <https://doi.org/10.1016/j.agee.2015.07.009>
6. Soana, E., Balestrini, R., Vincenzi, F., Bartoli, M., & Castaldelli, G. (2017). Mitigation of nitrogen pollution in vegetated ditches fed by nitrate-rich spring waters. *Agriculture, Ecosystems & Environment*, 243, 74-82. <https://doi.org/10.1016/j.agee.2017.04.004>
7. Nizzoli, D., Welsh, D. T., & Viaroli, P. (2020). Denitrification and benthic metabolism in lowland pit lakes: The role of trophic conditions. *Science of the Total Environment*, 703, 134804. <https://doi.org/10.1016/j.scitotenv.2019.134804>
8. Nizzoli, D., Bartoli, M., Azzoni, R., Longhi, D., Castaldelli, G., & Viaroli, P. (2018). Denitrification in a meromictic lake and its relevance to nitrogen flows within a moderately impacted forested catchment. *Biogeochemistry*, 137(1), 143-161. <https://doi.org/10.1007/s10533-017-0407-9>
9. Nizzoli, D., Welsh, D. T., Longhi, D., & Viaroli, P. (2014). Influence of *Potamogeton pectinatus* and microphytobenthos on benthic metabolism, nutrient fluxes and denitrification in a freshwater littoral sediment in an agricultural landscape: N assimilation versus N removal. *Hydrobiologia*, 737(1), 183-200. <https://doi.org/10.1007/s10750-013-1688-1>
10. Nizzoli, D., Welsh, D. T., Fano, E. A., & Viaroli, P. (2006). Impact of clam and mussel farming on benthic metabolism and nitrogen cycling, with emphasis on nitrate reduction pathways. *Marine Ecology Progress Series*, 315, 151-165. [10.3354/meps315151](https://doi.org/10.3354/meps315151)
11. Bartoli, M., Castaldelli, G., Nizzoli, D., & Viaroli, P. (2012). Benthic primary production and bacterial denitrification in a Mediterranean eutrophic coastal lagoon. *Journal of Experimental Marine Biology and Ecology*, 438, 41-51. <http://dx.doi.org/10.1016/j.jembe.2012.09.01>
12. Murphy, A. E., Nizzoli, D., Bartoli, M., Smyth, A. R., Castaldelli, G., & Anderson, I. C. (2018). Variation in benthic metabolism and nitrogen cycling across clam aquaculture sites. *Marine pollution bulletin*, 127, 524-535. <https://doi.org/10.1016/j.marpolbul.2017.12.003>
13. Magri, M., Benelli, S., Bonaglia, S., Zilius, M., Castaldelli, G., & Bartoli, M. (2020). The effects of hydrological extremes on denitrification, dissimilatory nitrate reduction to ammonium (DNRA) and mineralization in a coastal lagoon. *Science of The Total Environment*, 740, 140169. <https://doi.org/10.1016/j.scitotenv.2020.140169>
14. Soana, E., Gavioli, A., Vincenzi, F., Fano, E. A., & Castaldelli, G. (2020). Nitrate availability affects denitrification in *Phragmites australis* sediments (Vol. 49, No. 1, pp. 194-209). <https://doi.org/10.1002/ieq2.20000>
